# Supplementary material
Source: PubMed Central journal article supplement (PMC3391098)
Supplement: supp_M111.338350_jbc.M111.338350-1.pdf [file supp_M111.338350_jbc.M111.338350-1.pdf]

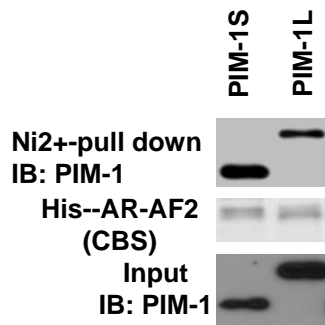

**Suppl Fig 1** Purified GST-PIM-1S or GST-PIM-1L was incubated with HIS-tagged AR-AF2 immobilized to Ni<sup>2+</sup> beads in PBS. After extensive wash, the bound proteins were detected by immunoblotting with anti-PIM-1.

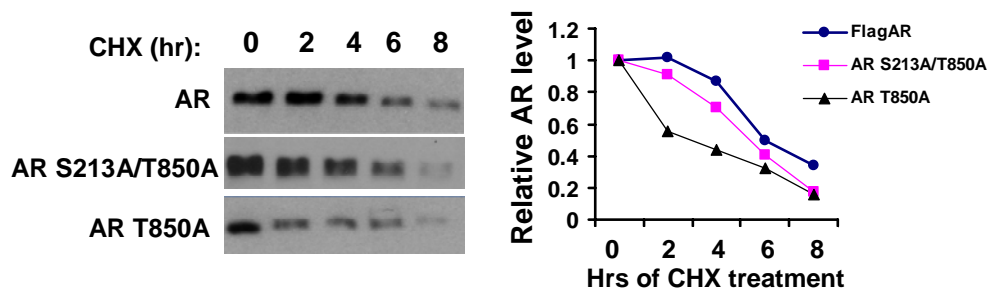

**Suppl Fig 2** 293T cells were transfected with FLAG-tagged AR or mutants. At 16 hours posttransfection, cells were treated with 100  $\mu$ g/ml CHX for the times indicated. Total cell lysates were blotted for AR. Quantification of AR levels was carried out using densitometry. Values were set relative to AR expression at time 0.

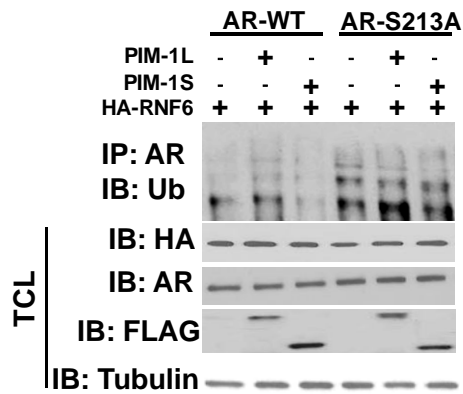

**Suppl Fig 3** COS-1 cells were cotransfected with PIM1, RNF6 and AR constructs. Lysates were subjected to IP under denaturing conditions using an AR antibody. Western blot with the indicated antibodies.

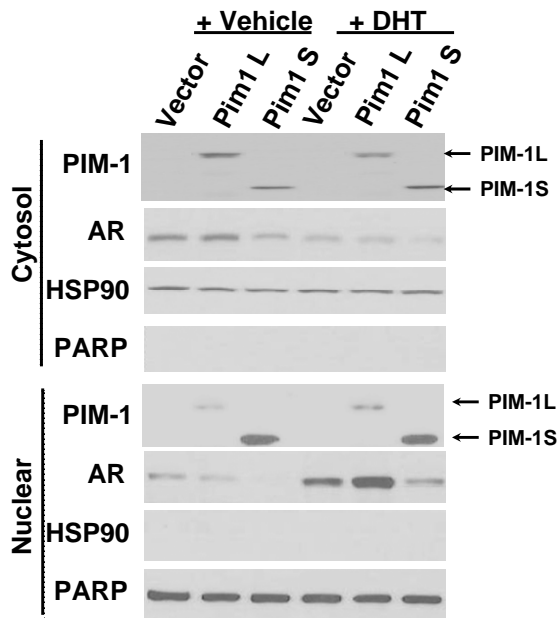

**Suppl Fig 4** CWR-R1 cells were infected with lentivirus encoding Pim-1S, Pim-1L or the vector control. At 48h post-infection, cells were treated with vehicle or DHT for 1h. The cytoplasmic and nuclear fractions were isolated using the Nuclear And Cytoplasmic Extraction kit (Pierce). The level of AR and PIM1 protein in each fraction was determined by Western blotting using the indicated antibodies. HSP90 and PARP were used as markers for the cytoplasmic and nuclear fractions, respectively.
